# Supplementary material for: Sex Differences in Chronic Thromboembolic Pulmonary Hypertension. Treatment Options over Time in a National Referral Center
Source: MDPI journal article supplement (doi:10.3390/jcm10184251), 2021-09-19
Supplement: s1 [file s1]

**Table S1.** CTEPH Patient Characteristics at Diagnosis by Sex.

| <b>CTEPH Patient Characteristics at Diagnosis by Sex (n = 453)</b> |                |                        |                      |                                           |
|--------------------------------------------------------------------|----------------|------------------------|----------------------|-------------------------------------------|
|                                                                    | <b>N (%)</b>   | <b>Women (n = 252)</b> | <b>Men (n = 201)</b> | <b>Statistical Significance (p Value)</b> |
| Age—years (median—IQR)                                             | 453<br>(100.0) | 64.8 (49.7–73.7)       | 58.6 (45.8–68.5)     | <0.001                                    |
| Arterial hypertension (n/%)                                        | 453<br>(100.0) | 107 (42.5)             | 77 (38.3)            | 0.371                                     |
| Diabetes (n/%)                                                     | 453<br>(100.0) | 35 (13.9)              | 15 (7.5)             | 0.030                                     |
| Dyslipidemia (n/%)                                                 | 453<br>(100.0) | 75 (29.8)              | 42 (20.9)            | 0.032                                     |
| Current or past smoking habit(n/%)                                 | 453<br>(100.0) | 54 (21.4)              | 93 (46.3)            | <0.001                                    |
| BMI (median—IQR)                                                   | 407<br>(89.8)  | 28.4 (24.2–31.6)       | 27.8 (24.6–30.4)     | 0.340                                     |
| Coronary artery disease (n/%)                                      | 453<br>(100.0) | 10 (4.0)               | 15 (7.5)             | 0.106                                     |
| Cancer history (n/%)                                               | 453<br>(100.0) | 36 (14.3)              | 28 (13.9)            | 0.914                                     |
| Functional class—NYHA (n/%)                                        |                |                        |                      |                                           |
| I–II                                                               | 435<br>(96.0)  | 80 (32.8)              | 82 (42.9)            | 0.030                                     |
| III–IV                                                             |                | 164 (67.2)             | 109 (57.1)           |                                           |
| Hypercoagulability (n/%)                                           | 453<br>(100.0) | 108 (42.9)             | 80 (39.8)            | 0.512                                     |
| PE history                                                         | 453<br>(100.0) | 198 (78.6)             | 159 (79.1)           | 0.890                                     |
| Six-minute walking test—distance (mean ± SD)                       | 363<br>(80.1)  | 348.7 ± 7.7            | 415.4 ± 10.2         | <0.001                                    |
| NtproBNP—mg/dL (mean ± SD)                                         | 348<br>(76.8)  | 1409.6 ± 166.9         | 1241.7 ± 164.3       | 0.491                                     |
| FEV1—% predicted (mean± SD)                                        | 314<br>(69.3)  | 87.6 ± 1.3             | 80.8 ± 1.5           | <0.001                                    |
| FVC—% predicted (median—IQR)                                       | 307<br>(67.8)  | 92.0 (75.0–99.0)       | 89.2 (76.5–98.7)     | 0.073                                     |

BMI = body mass index; DVT = deep vein thrombosis; FEV1 = forced expiratory volume in the first second; FVC = forced vital capacity; SD = standard deviation; PE = pulmonary embolism.

**Table S2.** CTEPH Patient Hemodynamic Parameters at Diagnosis by Type of Procedure and Sex (*n* = 453).

| CTEPH Patient Hemodynamic Values at Diagnosis by Type of Procedure and Sex ( <i>n</i> = 453) |                |                         |                         |                |               |                         |                         |                |                |                         |                         |                |
|----------------------------------------------------------------------------------------------|----------------|-------------------------|-------------------------|----------------|---------------|-------------------------|-------------------------|----------------|----------------|-------------------------|-------------------------|----------------|
|                                                                                              | PEA            |                         |                         |                | BPA           |                         |                         |                | MT             |                         |                         |                |
|                                                                                              | N (%)          | Women                   | Men                     | <i>p</i> Value | N (%)         | Women                   | Men                     | <i>p</i> Value | N (%)          | Women                   | Men                     | <i>p</i> Value |
| mPAP—<br>mmHg<br>(median—<br>Iqr)                                                            | 235<br>(100.0) | 46.0<br>(37.0–<br>57.0) | 44.0<br>(36.0–<br>55.0) | 0.223          | 91<br>(100.0) | 50.0<br>(42.0–<br>58.0) | 49.0<br>(39.0–<br>52.0) | 0.122          | 127<br>(100.0) | 40.0<br>(32.0–<br>50.0) | 45.0<br>(34.5–<br>51.5) | 0.516          |
| RAP—<br>mmHg<br>(median—<br>Iqr)                                                             | 218<br>(92.8)  | 8.0 (5.0–<br>12.0)      | 8.0<br>(5.5–<br>12.0)   | 0.702          | 91<br>(100.0) | 9.0 (6.0–<br>11.0)      | 8.0<br>(6.0–<br>11.0)   | 0.785          | 121<br>(95.3)  | 7.0 (4.0–<br>11.0)      | 8.0<br>(6.0–<br>11.0)   | 0.578          |
| CI—<br>L/min/m <sup>2</sup><br>(median—<br>IQR)                                              | 216<br>(91.9)  | 2.3 (1.9–<br>2.8)       | 2.4<br>(2.0–<br>2.8)    | 0.785          | 87 (95.6)     | 2.3 (1.9–<br>2.7)       | 2.1<br>(1.9–<br>2.5)    | 0.381          | 112<br>(88.2)  | 2.4 (2.0–<br>2.8)       | 2.5<br>(2.1–<br>2.8)    | 0.735          |
| PVR—WU<br>(median—<br>Iqr)                                                                   | 208<br>(88.5)  | 9.8 (6.4–<br>13.9)      | 7.8<br>(5.5–<br>10.5)   | 0.005          | 91<br>(100.0) | 10.1 (7.5–<br>15.0)     | 9.3<br>(6.0–<br>12.5)   | 0.106          | 125<br>(98.4)  | 6.9 (4.7–<br>11.0)      | 6.5<br>(5.0–<br>9.6)    | 0.738          |

CI = cardiac index; mPAP = mean pulmonary artery pressure; PVR = pulmonary vascular resistances; RAP = right atrial pressure; WU = Wood Units.
